# Supplementary material for: (CdSe/ZnS QDs)-ionic liquid-based headspace single drop microextraction for the fluorimetric determination of trimethylamine in fish
Source: Royal Society of Chemistry journal article supplement (doi:10.1039/c2an15914g), 2012-01-01

## SUPPLEMENTARY INFORMATION

**Figure S1.** Excitation and emission fluorescence spectra (A) and HTEM image (B) of the synthesized CdSe/ZnS QDs.

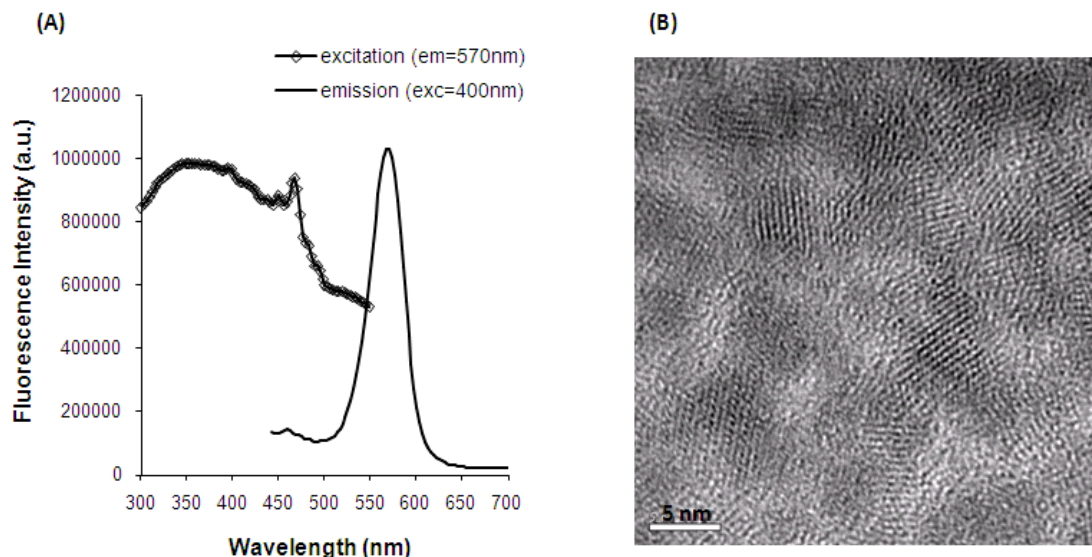

**Figure S2.** Effect of several variables on the fluorescence enhancing response for the extraction of a working standard solution of TMA at  $0.5 \text{ mg}\cdot\text{L}^{-1}$ : (A) Effect of the QD/IL proportion; (B) Effect of drop volume proportion; and (C) Effect of extraction time. In all cases, the analytical signal was  $\Delta I = (I - I_0)/I_0$ , where  $I_0$  is the original fluorescence of the QD-IL and  $I$  the fluorescence when  $0.5 \text{ mg}\cdot\text{L}^{-1}$  of TMA were extracted. (\* instability of the drop).

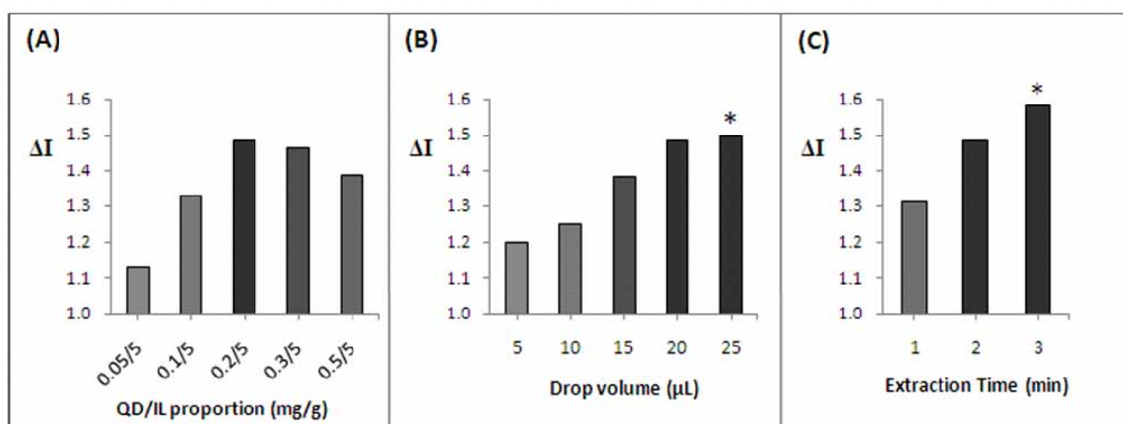

Supplement: c2an15914g.pdf [file c2an15914g.pdf]
